# Supplementary material
Source: publisher figshare collection journal article supplement (https://karger.figshare.com/ndownloader/files/28911078)
Supplement: Supplementary file 1 [file 28911078]

Supplemental Table 3: Differentially expressed genes in the colon mucosa from CD patients treated with UST therapy.

| Gene | Before  (mean) | After  (mean) | Log2  fold　change | p-value |
| --- | --- | --- | --- | --- |
| OAS3 | 92.5 | 56.4 | -0.714 | <0.001 |
| PTGDR2 | 15.3 | 6.9 | -1.159 | <0.001 |
| CD276 | 96.6 | 62.0 | -0.641 | 0.001 |
| TNFRSF13B | 3.3 | 13.1 | 1.991 | 0.002 |
| IL18R1 | 31.4 | 14.6 | -1.102 | 0.007 |
| NRP1 | 93.3 | 59.1 | -0.659 | 0.008 |
| NLRC5 | 109.5 | 80.0 | -0.454 | 0.009 |
| IL1RAP | 21.1 | 8.1 | -1.379 | 0.010 |
| IL1R1 | 72.3 | 45.4 | -0.672 | 0.010 |
| HRAS | 17.9 | 6.0 | -1.580 | 0.011 |
| IFNA1 | 3.6 | 9.8 | 1.458 | 0.013 |
| SIGLEC1 | 64.1 | 40.8 | -0.653 | 0.016 |
| GTF3C1 | 91.9 | 73.1 | -0.329 | 0.018 |
| IL23A | 13.4 | 7.2 | -0.898 | 0.023 |
| CREB5 | 18.0 | 6.4 | -1.505 | 0.027 |
| CDH5 | 20.8 | 13.1 | -0.668 | 0.027 |
| MST1R | 85.8 | 120.7 | 0.491 | 0.028 |
| CYBB | 136.4 | 91.1 | -0.583 | 0.029 |
| HDAC3 | 50.5 | 70.0 | 0.469 | 0.029 |
| EPCAM | 716.8 | 983.4 | 0.456 | 0.030 |
| IL10RA | 93.9 | 66.6 | -0.497 | 0.030 |
| IL6ST | 303.4 | 325.0 | 0.099 | 0.031 |
| F2RL1 | 82.2 | 137.1 | 0.737 | 0.034 |
| HLA-DPB1 | 561.3 | 445.0 | -0.335 | 0.034 |
| RELA | 11.9 | 22.7 | 0.936 | 0.036 |
| EP300 | 108.9 | 118.0 | 0.115 | 0.041 |
| CNOT10 | 36.8 | 51.3 | 0.478 | 0.041 |
| YTHDF2 | 48.7 | 71.3 | 0.550 | 0.041 |
| CD80 | 24.3 | 15.9 | -0.616 | 0.041 |
| LAIR2 | 37.0 | 23.0 | -0.688 | 0.050 |
